# Supplementary material
Source: Research Square preprint supplement (doi:10.21203/rs.3.rs-9331869/v1)
Supplement: Supplementary file 1 [file 93d0ca79fa779af686ba4ef4.docx]

Supplementary Data

# Table S1. Pearson correlation coefficients between variables

| Variable | Vanillic | Neoxanthin | Naringenin | TPC | TFC | DPPH | ABTS | Superoxide | CUPRAC |
| --- | --- | --- | --- | --- | --- | --- | --- | --- | --- |
| Vanillic | 1.0 | 0.722 | -0.667 | 0.737 | 0.813 | -0.185 | -0.421 | -0.143 | 0.384 |
| Neoxanthin | 0.722 | 1.0 | -0.924 | 0.628 | 0.606 | 0.519 | -0.491 | 0.402 | 0.067 |
| Naringenin | -0.667 | -0.924 | 1.0 | -0.519 | -0.412 | -0.518 | 0.682 | -0.457 | 0.025 |
| TPC | 0.737 | 0.628 | -0.519 | 1.0 | 0.913 | -0.064 | 0.134 | 0.348 | 0.806 |
| TFC | 0.813 | 0.606 | -0.412 | 0.913 | 1.0 | -0.14 | 0.081 | 0.087 | 0.745 |
| DPPH | -0.185 | 0.519 | -0.518 | -0.064 | -0.14 | 1.0 | -0.321 | 0.743 | -0.391 |
| ABTS | -0.421 | -0.491 | 0.682 | 0.134 | 0.081 | -0.321 | 1.0 | 0.062 | 0.522 |
| Superoxide | -0.143 | 0.402 | -0.457 | 0.348 | 0.087 | 0.743 | 0.062 | 1.0 | 0.201 |
| CUPRAC | 0.384 | 0.067 | 0.025 | 0.806 | 0.745 | -0.391 | 0.522 | 0.201 | 1.0 |

# Table S2. PCA loadings (contribution of variables to principal components)

| Variable | PC1 | PC2 |
| --- | --- | --- |
| Vanillic | 0.032 | -0.008 |
| Neoxanthin | 0.001 | 0.003 |
| Naringenin | -0.0 | -0.002 |
| TPC | 0.811 | 0.155 |
| TFC | 0.583 | -0.176 |
| DPPH | -0.027 | 0.883 |
| ABTS | 0.026 | -0.287 |
| Superoxide | 0.028 | 0.287 |
| CUPRAC | 0.0 | -0.0 |
